# Supplementary material for: Volume shrinkage and rheological studies of epoxidised and unepoxidised poly(styrene-block-butadiene-block-styrene) triblock copolymer modified epoxy resin–diamino diphenyl methane nanostructured blend systems
Source: Royal Society of Chemistry journal article supplement (doi:10.1039/c5cp00612k), 2015-01-01
Supplement: c5cp00612k1.pdf [file c5cp00612k1.pdf]

## Supporting information part

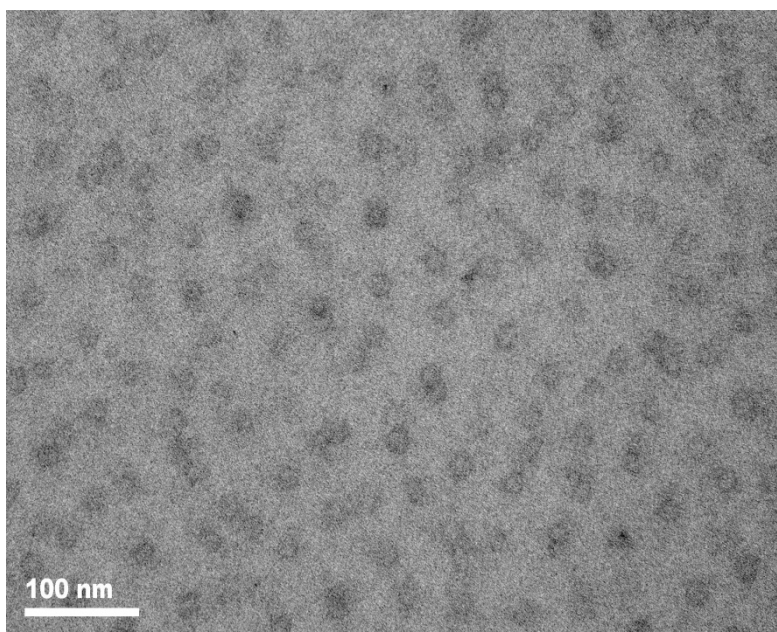

**S1.** HRTEM image of epoxy/DDM blends modified with 10 wt% of eSBS(47)

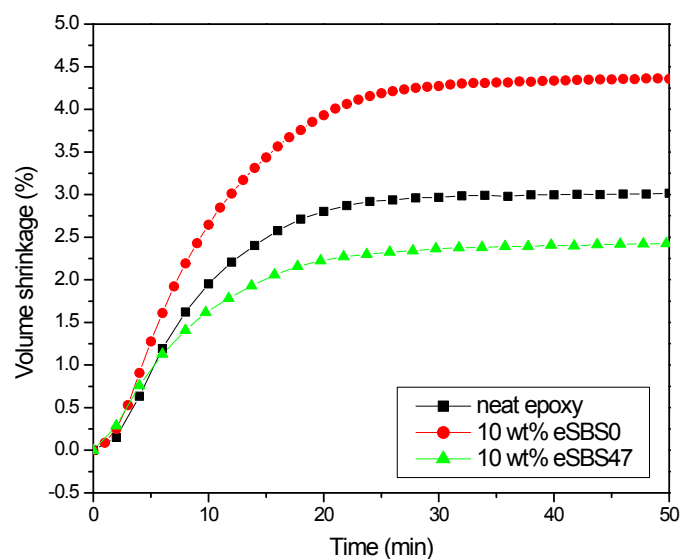

**S2.** Influence of eSBS (0 and 47) content on the volume shrinkage during curing (initial stages)
